# Supplementary material for: Paired metabolomics and volatilomics provides insight into transient high light stress response mechanisms of the coral Montipora mollis
Source: PubMed Central journal article supplement (PMC11182861; doi:10.1007/s11306-024-02136-9), 2024-06-17

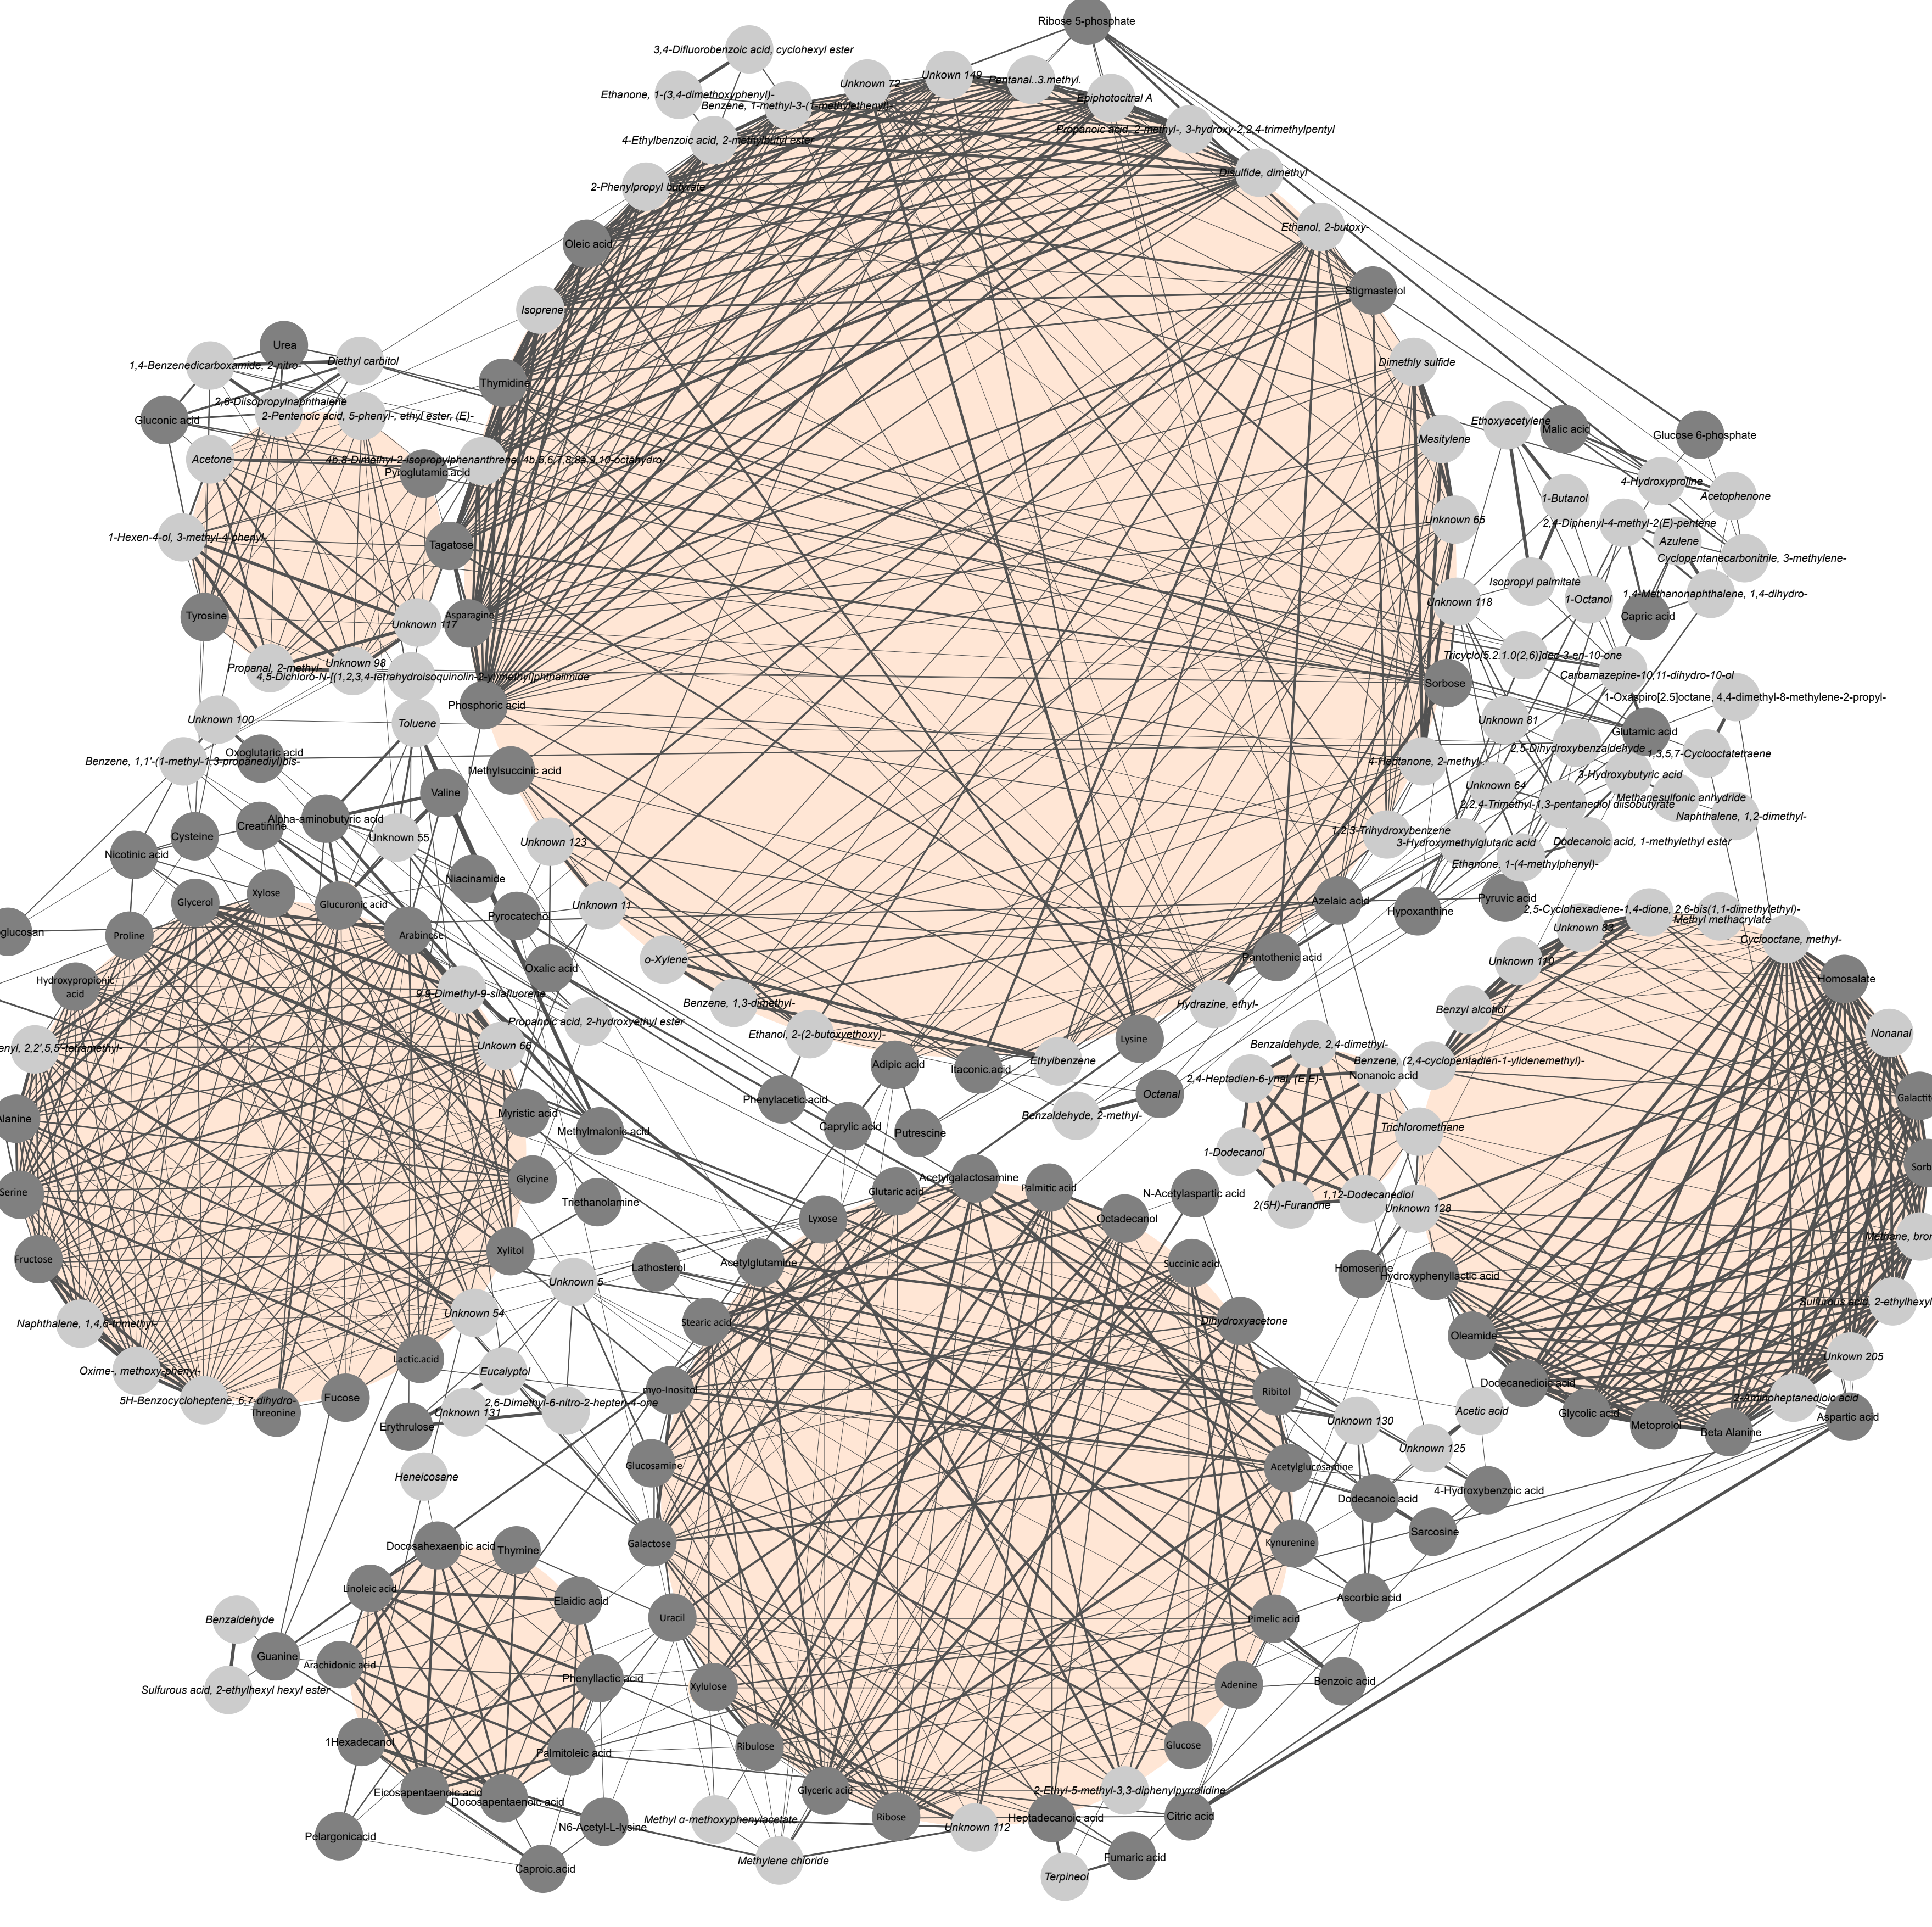

Supplement: 11306_2024_2136_MOESM1_ESM.pdf [file 11306_2024_2136_MOESM1_ESM.pdf]
